# Supplementary material for: RGD-peptides modifying dexamethasone: to enhance the anti-inflammatory efficacy and limit the risk of osteoporosis
Source: Royal Society of Chemistry journal article supplement (doi:10.1039/c5md00215j), 2015-01-01
Supplement: c5md00215j1.pdf [file c5md00215j1.pdf]

## Supporting Information

### **RGD-peptides modifying dexamethasone: To enhance the efficacy of anti-inflammation and limit the risk of osteoporosis**

Hualong Yu,<sup>a</sup> Shenghui Mei,<sup>a</sup> Li Zhao,<sup>b</sup> Ming Zhao,<sup>\*,a,c</sup> Yuji Wang,<sup>a</sup> Haimei Zhu,<sup>a</sup> Yaonan Wang,<sup>a</sup> Jianhui Wu,<sup>a</sup> Chunying Cui,<sup>a</sup> Wenyun Xu,<sup>a</sup> Shiqi Peng<sup>\*,a</sup>

<sup>a</sup> Beijing area major laboratory of peptide and small molecular drugs; Engineering Research Center of Endogenous Prophylactic of Ministry of Education of China; Beijing Laboratory of Biomedical Materials; College of Pharmaceutical Sciences ,of Capital Medical University, Beijing 100069, P.R. China

<sup>b</sup>School of Life Science, Jiangxi Normal University of Science and Technology, Nanchang, China

<sup>c</sup>Faculty of Biomedical Science and Environmental Biology, Kaohsiung Medical University, Kaohsiung, Taiwan

\*To whom correspondence should be addressed. M. Z.: College of Pharmaceutical Sciences, Capital Medical University, Beijing 100069, China. Tel: 86-10-8391-1535, Email: [mingzhao@bjmu.edu.cn](mailto:mingzhao@bjmu.edu.cn); S.P.: College of Pharmaceutical Sciences, Capital Medical University, Beijing 100069, China. Tel: 86-10-8391-1528, Fax: 86-10-8391-1528. Email: [sqpeng@bjmu.edu.cn](mailto:sqpeng@bjmu.edu.cn).

## Experimental

### 1. General

The protected amino acids and the chemicals were purchased from Sigma-Aldrich Co. (St. Louis, MO, USA) and were purified when necessary. Column chromatography was performed using silica gel (200-300 mesh, Qingdao Haiyang Chemical Co., Qingdao, P. R. China). Purity of intermediates (>95%) and products (>98%) were determined by TLC analysis (Qingdao silica gel plates of GF254) and HPLC analysis (CHIRALPAK AH-H column, 4.6 × 250 mm, Daicel Chemical IND., LTD.). <sup>1</sup>H NMR (300 MHz) and <sup>13</sup>C NMR (75 MHz) spectra were recorded on Varian INOVA-300 MHz spectrometer with DMSO-*d*<sub>6</sub> as the solvent and tetramethylsilane as internal standard. <sup>1</sup>H NMR (800 MHz), <sup>13</sup>C NMR (200 MHz) and the ROESY 2D NMR spectra were recorded on Bruker Avance II 800 MHz spectrometer with DMSO-*d*<sub>6</sub> as the solvent and tetramethylsilane as internal standard. ESI/MS was tested on ZQ 2000 (Waters, US) and solariX FT-ICR mass spectrometer (Bruker Daltonik) consisting of an ESI/MALDI dual ion source and 9.4 T superconductive magnet.

### 2. Synthesis

**Boc-Arg(NO<sub>2</sub>)-Gly-OBzl** At 0 °C to a solution of 800 mg (2.5 mmol) of Boc-Arg(NO<sub>2</sub>) in 10 mL of anhydrous THF the solution of 338 mg (2.5 mmol) HOBt and 619 mg (3.0 mmol) of DCC in 5 mL of anhydrous THF was added and stirred for 20 min. To this solution a solution of 775 mg (2.3 mmol) of Tos-Gly-OBzl and 230 mg (2.3 mmol) of N-methylmorpholine in 5 mL of anhydrous THF was added, stirred at

room temperature for 24 h, and TLC ( $\text{CH}_2\text{Cl}_2/\text{MeOH}$ , 20/1) indicated the disappearance of Tos-Gly-OBzl. The reaction mixture was evaporated under vacuum, the residue was dissolved with 150 mL of ethyl acetate, the solution was successively washed with saturated aqueous  $\text{NaHCO}_3$  (30 mL  $\times$  3), saturated aqueous  $\text{NaCl}$  (30 mL  $\times$  3), saturated aqueous  $\text{KHSO}_4$  (30 mL  $\times$  3) and saturated aqueous  $\text{NaCl}$  (30 mL  $\times$  3). The ethyl acetate phase was dried with anhydrous  $\text{Na}_2\text{SO}_4$ . After filtration the filtrate was evaporated under vacuum to provide 1.28 g (94%) of the title compound as colourless powders. ESI-MS( $m/z$ ) 568  $[\text{M} + \text{H}]^+$ .

**Boc-Arg( $\text{NO}_2$ )-Gly** At 0 °C to a solution of 1.167 g (2.5 mmol) of Boc-Arg( $\text{NO}_2$ )-Gly-OBzl in 20 mL of  $\text{CH}_3\text{OH}$ , 2.5 mL of aqueous  $\text{NaOH}$  (2 M) was added, stirred for 30 min, and TLC ( $\text{CH}_2\text{Cl}_2/\text{MeOH}$ , 20/1) indicated the disappearance of Boc-Arg( $\text{NO}_2$ )-Gly-OBzl. The reaction mixture was adjusted to pH 2 with hydrochloric acid (2 N), extracted with ethyl acetate (50 mL  $\times$  3), and the ethyl acetate phase was dried with anhydrous  $\text{Na}_2\text{SO}_4$ . After filtration the filtrate was evaporated under vacuum to provide 1.075 g (90%) of the title compound for next reaction.

**Boc-Ser(Bzl)-OBzl** At room temperature to a solution of 739 mg (2.5 mmol) of Boc-Ser(Bzl) in 10 mL of ethanol a solution of 405 mg (1.25 mmol) of  $\text{Cs}_2\text{CO}_3$  in 2 mL of distilled water was added, the reaction mixture was stirred for 15 min, and TLC (ethyl acetate/petroleum, 1/1) indicated the disappearance of Boc-Ser(Bzl)-OCs, which was dissolved in 2 mL of anhydrous DMF, mixed with 0.3 mL (2.5 mmol) of  $\text{BrCH}_2\text{C}_6\text{H}_5$ , at 55-60 °C stirred for 4 h, and TLC ( $\text{CHCl}_3/\text{MeOH}$ , 30/1) indicated the disappearance of Boc-Ser(Bzl). The reaction mixture was evaporated under vacuum, the residue was

dissolved with 50 mL of ethyl acetate, filtrated, the filtrate was washed successively washed with saturated aqueous  $\text{NaHCO}_3$  (30 mL  $\times$  3) and saturated aqueous  $\text{NaCl}$  (30 mL  $\times$  3). The ethyl acetate phase was dried with anhydrous  $\text{Na}_2\text{SO}_4$ . After filtration the filtrate was evaporated under vacuum to provide 873 mg (91%) of the title compound as colourless syrupy. ESI-MS( $m/z$ ) 386  $[\text{M} + \text{H}]^+$ .

**HCl·Ser(Bzl)-OBzl** At 0 °C to a solution of 962 mg (2.5 mmol) of Boc-Ser(Bzl)-OBzl in 6 mL of ethyl acetate 10 mL of the solution of hydrogen chloride in ethyl acetate (4 N) was added, stirred for 2 h, and TLC ( $\text{CHCl}_3/\text{MeOH}$ , 20/1) indicated the disappearance of Boc-Ser(Bzl)-OBzl. The reaction mixture was evaporated under vacuum, the residue was crystalized in a 1/1 mixture of methanol and ether to provide the title compound for the next reaction.

**Boc-Asp(OBzl)-Ser(Bzl)-OBzl** Using the procedure of preparing Boc-Arg( $\text{NO}_2$ )-Gly-OBzl from 807 mg (2.5 mmol) of Boc-Asp(OBzl) and 742 mg (2.3 mmol) of HCl·Ser(Bzl)-OBzl 1.28 g (94%) of the title compound was obtained as colorless powders. ESI-MS( $m/z$ ) 592  $[\text{M} + \text{H}]^+$ .

**HCl·Asp(OBzl)-Ser(Bzl)-OBzl** Using the procedure of preparing HCl·Ser(Bzl)-OBzl from 1.477 g (2.5 mmol) of Boc-Asp(OBzl)-Ser(Bzl)-OBzl 1.277 g (97%) of the title compound was obtained for the next reaction. ESI-MS ( $m/z$ ) 492  $[\text{M} + \text{H}]^+$ .

**Boc-Arg( $\text{NO}_2$ )-Gly-Asp(OBzl)-Ser(Bzl)-OBzl** Using the procedure of preparing Boc-Arg( $\text{NO}_2$ )-Gly-OBzl from 1195 mg (2.5 mmol) of Boc-Arg( $\text{NO}_2$ )-Gly and 1317 mg (2.3 mmol) of HCl·Asp(OBzl)-Ser(Bzl)-OBzl 2.115 g (90%) of the title compound was obtained as colorless powders. ESI-MS ( $m/z$ ) 941  $[\text{M} + \text{H}]^+$ .

**Arg-Gly-Asp-Ser** At 0 °C to a solution of 941 mg (1.0 mmol) of Boc-Arg(NO<sub>2</sub>)-Gly-Asp(OBzl)-Ser(Bzl)-OBzl in 3 mL of CF<sub>3</sub>CO<sub>2</sub>H 1 mL of trifluomethane sulfonic acid was added, the reaction mixture was stirred for 20 min, and TLC (CH<sub>2</sub>Cl<sub>2</sub>/MeOH, 10/1) indicated the disappearance of Boc-Arg(NO<sub>2</sub>)-Gly-Asp(OBzl)-Ser(Bzl)-OBzl. To the reaction mixture 80 mL of anhydrous ether was added to form colorless precipitates. The precipitates were collected by filtration, and dissolved in 1 mL of distilled water. The solution was adjusted to pH 8 with concentrated ammonia, filtrated and the filtrate was desalt on column of Sephadex G10. The fraction was evaporated under vacuum to provide 350 mg (81%) of the title compound as colorless powders. ESI-MS (m/z) 432 [M - H]<sup>-</sup>.

**Boc-Asp(OBzl)-Val-OBzl** Using the procedure of preparing Boc-Arg(NO<sub>2</sub>)-Gly-OBzl from 807 mg (2.5 mmol) of Boc-Asp(OBzl) and 947 mg (2.3 mmol) of Tos·Val-OBzl 1.28 g (94%) of the title compound was obtained as colorless powders. ESI-MS (m/z) 510 [M + H]<sup>+</sup>.

**HCl·Asp(OBzl)-Val-OBzl** Using the procedure of preparing HCl·Ser(Bzl)-OBzl from 1.272 g (2.5 mmol) of Boc-Asp(OBzl)-Val-OBzl 1.00 g (92%) of the title compound was obtained for the next reaction. ESI-MS (m/z) 410 [M + H]<sup>+</sup>.

**Boc-Arg(NO<sub>2</sub>)-Gly-Asp(OBzl)-Val-OBzl** Using the procedure of preparing Boc-Arg(NO<sub>2</sub>)-Gly-OBzl from 1195 mg (2.5 mmol) of Boc-Arg(NO<sub>2</sub>)-Gly and 1087 mg (2.3 mmol) HCl·Asp(OBzl)-Val-OBzl 1.925 g (89%) of the title compound was obtained as colorless powders. ESI-MS (m/z) 863 [M + H]<sup>+</sup>.

**Arg-Gly-Asp-Val** Using the procedure of preparing Arg-Gly-Asp-Ser from 862 mg

(1.0 mmol) of Boc-Arg(NO<sub>2</sub>)-Gly-Asp(OBzl)-Val-OBzl 301 mg (68%) of the title compound was obtained as colorless powders. ESI-MS (m/z) 444 [M - H]<sup>-</sup>.

**Boc-Asp(OBzl)-Phe-OBzl** Using the procedure of preparing Boc-Arg(NO<sub>2</sub>)- Gly-OBzl from 807 mg (2.5 mmol) of Boc-Asp(OBzl) and 1067 mg (2.3 mmol) of Tos·Phe-OBzl 1.28 g (92%) of the title compound was obtained as colorless powders. ESI-MS (m/z) 558 [M + H]<sup>+</sup>.

**HCl·Asp(OBzl)-Phe-OBzl** Using the procedure of preparing Arg-Gly-Asp-Ser from 1.395 g (2.5 mmol) of Boc-Asp(OBzl)-Phe-OBzl 1.171 g (95%) of the title compound was obtained as colorless powders. ESI-MS (m/z) 458 [M + H]<sup>+</sup>.

**Boc-Arg(NO<sub>2</sub>)-Gly-Asp(OBzl)-Phe-OBzl** Using the procedure of preparing Boc-Arg(NO<sub>2</sub>)-Gly-OBzl from 1195 mg (2.5 mmol) of Boc-Arg(NO<sub>2</sub>)-Gly and 1232 mg (2.3 mmol) of HCl·Asp(OBzl)-Phe-OBzl 2.004 g (88%) of the title compound was obtained as colorless powders. ESI-MS (m/z) 911 [M + H]<sup>+</sup>.

**Arg-Gly-Asp-Phe** Using the procedure of preparing Arg-Gly-Asp-Ser from 910 mg (1.0 mmol) of Boc-Arg(NO<sub>2</sub>)-Gly-Asp(OBzl)-Phe-OBzl 320 mg (65%) of the title compound was obtained as colorless powders. ESI-MS (m/z) 492 [M - H]<sup>-</sup>.

**(9R,10S,11S,13S,16R,17R)-9-Fluoro-7,8,11,12,13,15,16,17-octahydro-11,17-**

**dihydroxy-17-(2-carboxyethylcarbonyloxy)-10,13,16-trimethyl-6H-**

**cyclopenta[a]phenanthren-3(9H,10H,14H)one (1)** In the presence of 1.46 g (12 mmol) of DMAP (dimethylaminopyridine) 3.93 g (10 mmol) of Dex in 150 mL of anhydrous THF was treated with 1.3 g (13 mmol) of butanedione by preventing from light for 48 h, and TLC (CH<sub>2</sub>Cl<sub>2</sub>/CH<sub>3</sub>OH, 20/1) indicated the disappearance of Dex.

After addition of 30 mL of water the reaction mixture was evaporated under vacuum to remove THF, the residue was adjusted to pH 2 with hydrochloric acid (2 M), the formed precipitates were collected with filtration to provide 4.64 g (94%) of the title compound as colorless powders. ESI/MS ( $m/z$ ) 491  $[M - H]^-$ .  $^1H$  NMR (BHSC-300, DMSO- $d_6$ ):  $\delta/ppm$  = 7.29 (d,  $J$  = 10.2 Hz, 1H), 6.23 (d,  $J$  = 9.3 Hz, 1H), 6.01 (s, 1H), 5.42 (s, 1H), 5.17 (s, 1H), 5.05 (d,  $J$  = 17.7 Hz, 1H), 4.80 (d,  $J$  = 17.7 Hz, 1H), 4.15 (m, 1H), 2.88 (m, 1H), 2.52 (m, 2H), 2.61 (m, 3H), 2.34 (m, 2H), 2.15 (m, 2H), 1.77 (m, 1H), 1.61 (m, 2H), 1.49 (s, 3H), 1.35 (m, 1H), 1.08 (m, 1H), 0.88 (s, 3H), 0.79 (d,  $J$  = 7.2 Hz, 3H).  $^{13}C$  NMR (BHSC-75, DMSO- $d_6$ ):  $\delta/ppm$  = 205.16, 185.78, 173.63, 172.10, 167.56, 153.23, 129.44, 124.55, 102.87, 100.55, 90.91, 71.12, 70.63, 68.50, 48.38, 43.74, 36.07, 34.17, 32.37, 31.13, 30.74, 29.05, 19.00, 16.90, 15.70.

**(9R,10S,11S,13S,16R,17R)-9-Fluoro-7,8,11,12,13,15,16,17-octahydro-11,17-dihydroxy-17-(2-pyrrolidine-2,5-dione-1-yl-oxycarbonylthylcarbonyloxy)-**

**10,13,16-trimethyl-6H-cyclopenta[a]phenanthren-3(9H,10H,14H)one (2)** In the presence of 2.50 g (13 mmol) of 1-ethyl-3-(3-dimethylaminopropyl)carbodiimide (EDC) 4.92 g (10 mmol) of (9R,10S,11S,13S,16R,17R)-9-fluoro-7,8,11,12,13,15,16,17-octahydro-11,17-dihydroxy-17-(2-carboxyethylcarbonyloxy)-10,13,16-trimethyl-6H-cyclopenta-[a]phenanthren-3(9H,10H,14H)-one (**1**) in 100 mL of THF and 10 mL of DMF was treated with 1.50 g (13 mmol) of N-hydroxysuccinimide by preventing from light for 24 h, and TLC ( $CH_2Cl_2/CH_3OH$ , 20/1) indicated the disappearance of **1**. The reaction mixture was evaporated under vacuum to remove THF, the residue was dissolved in 150 mL of ethyl acetate, and the

solution was successively washed with saturated aqueous NaHCO<sub>3</sub> (30 mL × 3), saturated aqueous NaCl (30 mL × 3), saturated aqueous KHSO<sub>4</sub> (30 mL × 3) and saturated aqueous NaCl (30 mL × 3). The ethyl acetate phase was dried with anhydrous Na<sub>2</sub>SO<sub>4</sub>. After filtration the filtrate was evaporated under vacuum, the residue was purified on silica gel column (petroleum/acetone, 1/1) to provide 5.37 g (91%) of the title compound as colorless powders. ESI/MS (m/z) 612 [M + Na]<sup>+</sup>. <sup>1</sup>H NMR (BHSC-300, DMSO-*d*<sub>6</sub>): δ/ppm = 7.29 (d, *J* = 10.2 Hz, 1H), 6.23 (d, *J* = 10.2 Hz, 1H), 6.01 (s, 1H), 5.41 (d, *J* = 3.9 Hz, 1H), 5.18 (s, 1H), 5.10 (d, *J* = 17.4 Hz, 1H), 4.82 (d, *J* = 17.7 Hz, 1H), 4.16 (m, 1H), 2.98 (t, *J* = 6.3 Hz, 1H), 2.81 (m, 6H), 2.63 (m, 1H), 2.34 (m, 2H), 2.16 (t, *J* = 11.7 Hz, 2H), 1.78 (m, 1H), 1.64 (d, *J* = 11.7 Hz, 1H), 1.56 (d, *J* = 13.5 Hz, 1H), 1.50 (s, 3H), 1.34 (m, 1H), 1.08 (m, 1H), 0.89 (s, 3H), 0.80 (d, *J* = 7.2 Hz, 3H). <sup>13</sup>C NMR (BHSC-75, DMSO-*d*<sub>6</sub>): δ/ppm = 205.02, 185.74, 171.07, 170.53, 168.67, 167.49, 153.19, 129.45, 124.57, 102.87, 100.55, 90.92, 71.22, 70.73, 68.75, 48.56, 43.76, 36.14, 33.93, 32.38, 31.13, 30.74, 28.35, 27.75, 26.16, 25.90, 23.61, 17.01, 16.18.

**(9R,10S,11S,13S,16R,17R)-9-Fluoro-7,8,11,12,13,15,16,17-octahydro-11,17-**

**dihydroxy-17-(2-Arg-Gly-Asp-Val-oxycarbonylthylcarbonyloxy)-10,13,16-**

**trimethyl- 6H-cyclopenta[a]phenanthren-3(9H,10H,14H)one (4a)** To a solution of

782 mg (1.4 mmol) of (9R,10S,11S,13S,16R,17R)-9-fluoro-7,8,11,12,13,15,16,17-octahydro-

11,17-dihydroxy-17-(2-pyrrolidine-2,5-dione-1-yl-oxycarbonylthylcarbonyloxy)-10,13,16-trimethyl-6H-cyclopenta[a]phenanthren-

3(9H,10H,14H)-one (2) in 20 mL of DMF, 10 mL of water and 623 mg (1.4 mmol) of



RGDV were successively added. The reaction mixture was adjusted to pH 8 with N-methylmorpholine, stirred by preventing from light for 48 h, and TLC (CH<sub>3</sub>OH/HOAc, 1000/5) indicated the disappearance of **2**. The reaction mixture was evaporated under vacuum to remove DMF, the residue was extracted with methanol (20 mL × 5), the extract was evaporated under vacuum, the formed colorless powders were washed with ether/acetone (5/1, 20 mL × 6), and purified on preparative TLC to provide 240 mg (26%) of the title compound as colorless powders. Mp 139 - 143 °C. ESI/MS (m/z) 919 [M - H]<sup>-</sup>.  $[\alpha]_D^{20} = 34.8$  (c = 0.13, CH<sub>3</sub>OH). IR (KBr) 3380, 2959, 1664, 1580, 1409, 1178, 1043, 891, 652 cm<sup>-1</sup>. <sup>1</sup>H NMR (BHSC-300, DMSO-*d*<sub>6</sub>) δ/ppm = 10.14 (s, 1H), 9.16 (d, *J* = 8.1 Hz, 1H), 9.03 (m, 1H), 8.64 (d, *J* = 7.5 Hz, 1H), 7.83 (m, 2H), 7.34 (d, *J* = 9.9 Hz, 1H), 7.03 (d, *J* = 8.1 Hz, 1H), 6.22 (d, *J* = 10.2 Hz, 1H), 6.00 (s, 1H), 5.74 (s, 1H), 5.08 (d, *J* = 17.4 Hz, 1H), 4.80 (d, *J* = 17.7 Hz, 1H), 4.38 (d, *J* = 5.2 Hz, 1H), 4.25 (m, 1H), 4.16 (d, *J* = 10.2 Hz, 1H), 4.00 (d, *J* = 16.2 Hz, 1H), 3.80 (m, 1H), 3.54 (m, 2H), 3.17 (s, 3H), 2.88 (m, 2H), 2.60 (m, 3H), 2.32 (m, 2H), 2.16 (m, 3H), 1.66 (m, 3H), 1.56 (m, 3H), 1.49 (s, 3H), 1.34 (m, 2H), 1.07 (m, 1H), 0.89 (s, 3H), 0.79 (d, *J* = 6.9 Hz, 3H), 0.75 (d, *J* = 6.3 Hz, 6H). <sup>13</sup>C NMR (BHSC-75, DMSO-*d*<sub>6</sub>) δ/ppm = 211.61, 206.95, 185.79, 178.19, 176.00, 172.31, 171.24, 169.21, 168.58, 167.60, 153.40, 129.37, 124.55, 102.88, 90.80, 72.69, 66.58, 60.53, 59.57, 53.20, 51.18, 48.95, 47.91, 43.74, 36.25, 34.27, 32.52, 31.54, 30.78, 29.31, 28.50, 27.74, 25.52, 23.48, 20.07, 18.60, 17.07, 15.73.

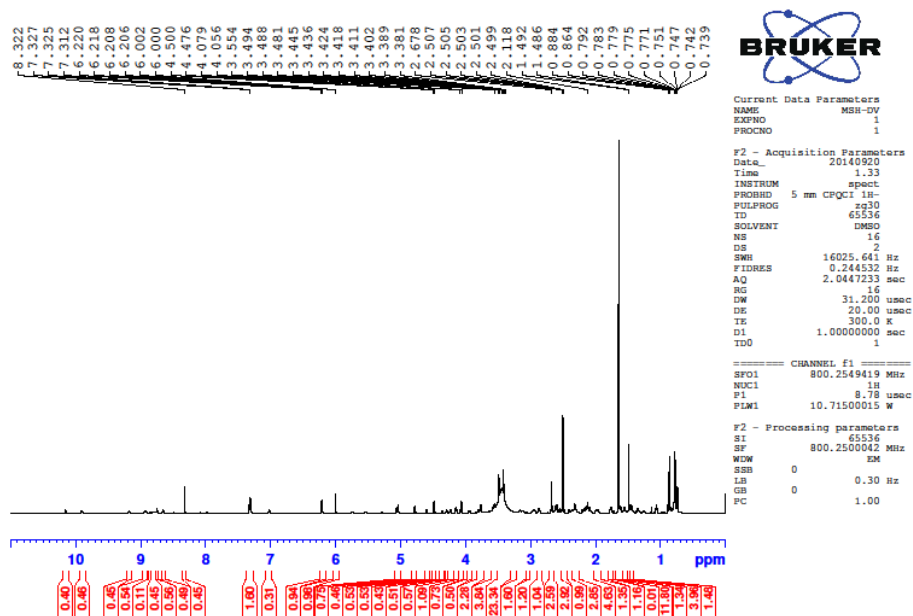

Figure S1 <sup>1</sup>H NMR of RGDV-Dex (4a).

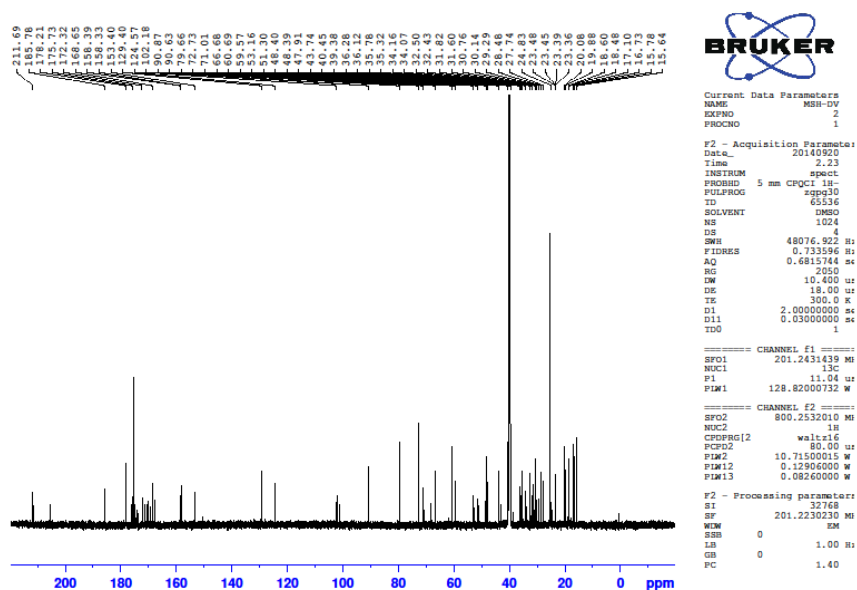

Figure S2 <sup>13</sup>C NMR of RGDV-Dex (4a).

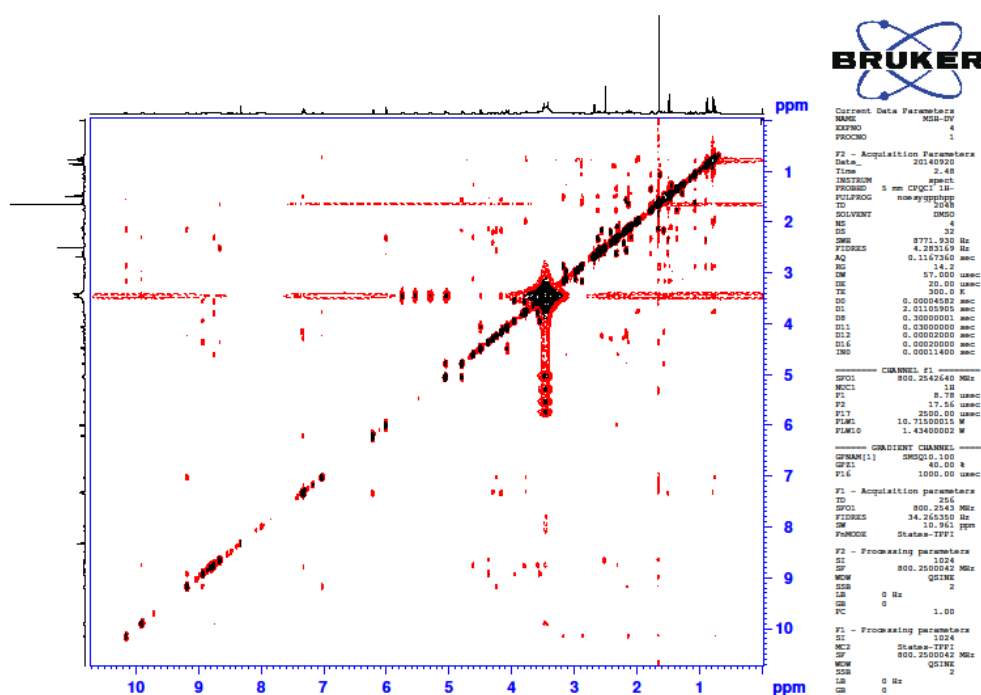

Figure S3 ROESY 2D NMR spectrum of RGDV-Dex (4a).

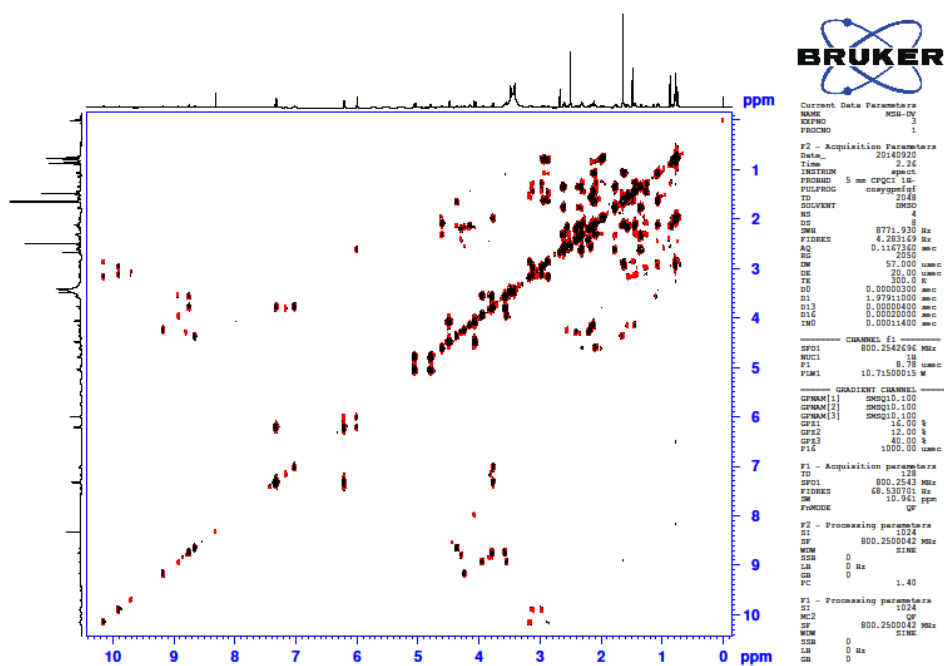

Figure S4 COSY 2D NMR spectrum of RGDV-Dex (4a).

(9R,10S,11S,13S,16R,17R)-9-Fluoro-7,8,11,12,13,15,16,17-octahydro-11,17-dihydroxy-17-(2-Arg-Gly-Asp-Ser-oxycarbonylthylcarbonyloxy)-10,13,16-

**trimethyl- 6H-cyclopenta[a]phenanthren-3(9H,10H,14H)one (4b)** Using the procedure of preparing **4a** from 782 mg (1.4 mmol) of **2** and 606 mg (1.4 mmol) of RGDS 318 mg (35%) of the title compound was obtained as colorless powders. Mp 177 - 179 °C. ESI/MS (m/z) 907 [M - H]<sup>-</sup>.  $[\alpha]_D^{20} = 72.1$  (c = 0.14, CH<sub>3</sub>OH). IR (KBr) 3363, 2942, 1663, 1405, 1246, 1180, 1041, 891, 650 cm<sup>-1</sup>; <sup>1</sup>H NMR (BHSC-300, DMSO-*d*<sub>6</sub>) δ/ppm = 10.02 (s, 1H), 8.73 (m, 1H), 8.51 (d, *J* = 7.5 Hz, 1H), 8.39 (d, *J* = 7.5 Hz, 1H), 7.91 (m, 1H), 7.58 (m, 2H), 7.33 (d, *J* = 10.0 Hz, 1H), 7.23 (d, *J* = 5.0 Hz, 1H), 6.22 (d, *J* = 9.5 Hz, 1H), 6.01 (s, 1H), 5.57 (s, 1H), 5.06 (d, *J* = 17.5 Hz, 1H), 4.80 (d, *J* = 17.5 Hz, 1H), 4.30 (m, 2H), 4.13 (m, 1H), 3.92 (d, *J* = 17.0 Hz, 1H), 3.78 (m, 2H), 3.58 (d, *J* = 16.5 Hz, 1H), 3.50 (m, 2H), 3.18 (m, 1H), 2.93 (m, 3H), 2.68 (m, 1H), 2.65 (m, 4H), 2.36 (m, 3H), 2.02 (m, 1H), 1.78 (m, 1H), 1.70 (s, 3H), 1.64 (d, *J* = 11.5 Hz, 1H), 1.57 (d, *J* = 13.0 Hz, 1H), 1.50 (s, 3H), 1.45 (m, 2H), 1.36 (m, 2H), 0.90 (s, 3H), 0.80 (d, *J* = 7.0 Hz, 3H). <sup>13</sup>C NMR (BHSC-75, DMSO-*d*<sub>6</sub>) δ/ppm = 211.65, 185.80, 178.17, 175.83, 172.37, 171.34, 169.21, 168.79, 167.59, 153.35, 129.41, 124.55, 102.40, 90.83, 71.22, 66.63, 62.92, 56.13, 52.76, 50.96, 48.54, 47.92, 43.74, 36.27, 35.35, 34.06, 32.50, 30.77, 29.25, 28.53, 27.73, 25.14, 24.50, 23.39, 17.09, 16.72, 15.74.

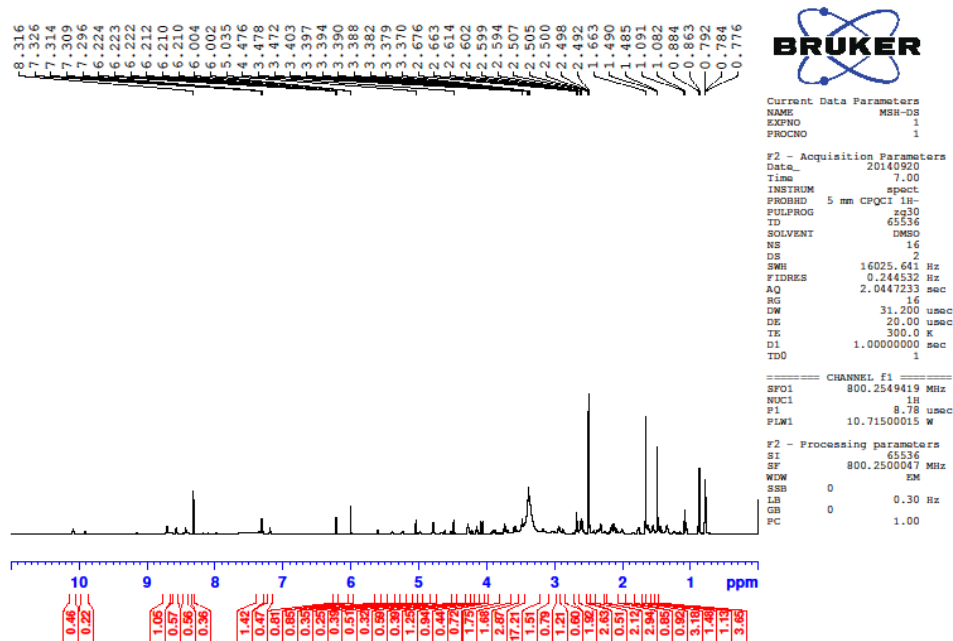

Figure S5 <sup>1</sup>H NMR of RGDS-Dex (4b).

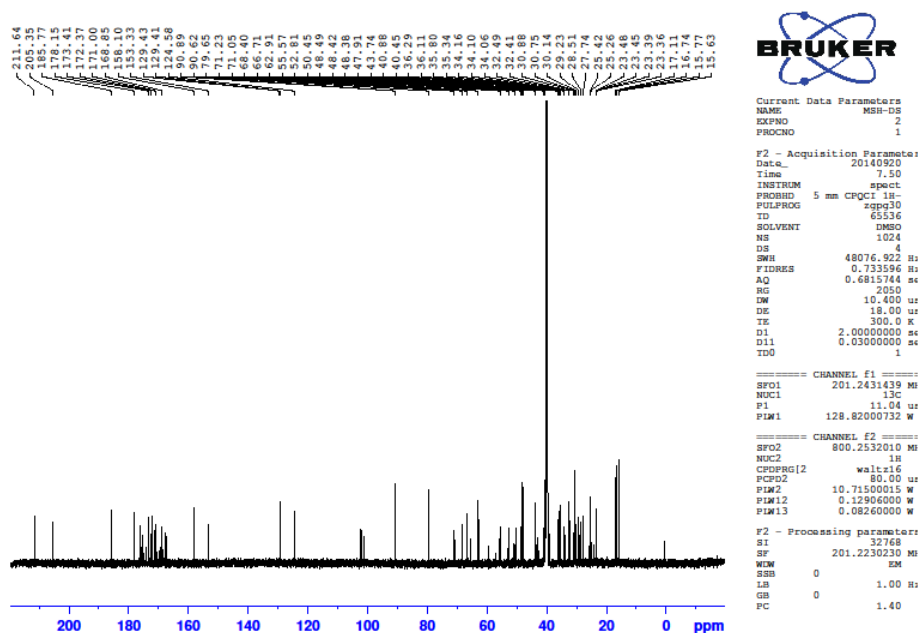

Figure S6 <sup>13</sup>C NMR of RGDS-Dex (4b).

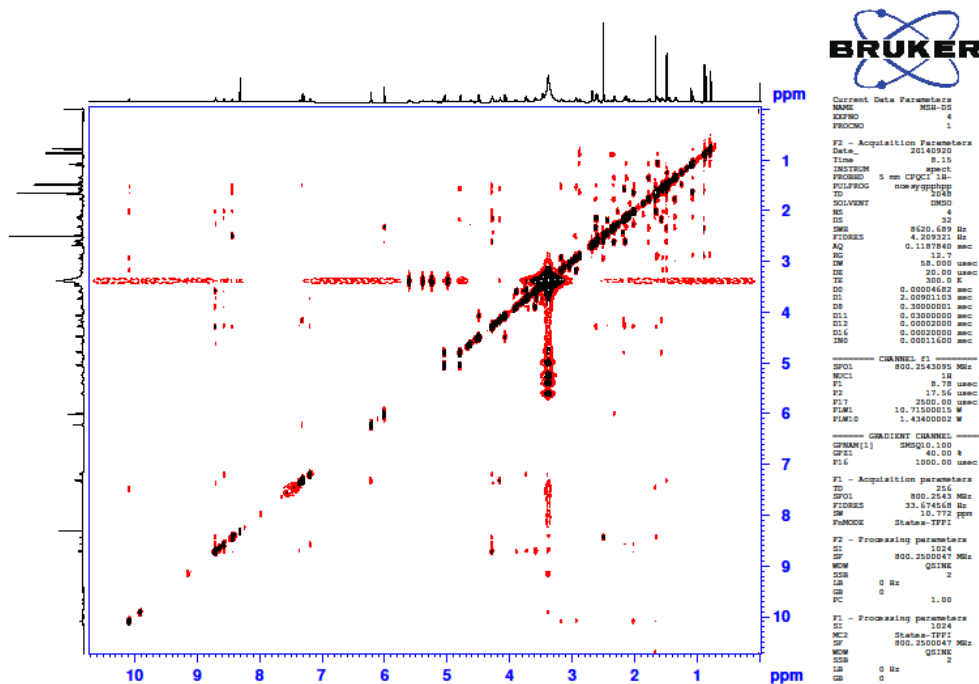

Figure S7 ROESY 2D NMR spectrum of RGDS-Dex (**4b**).

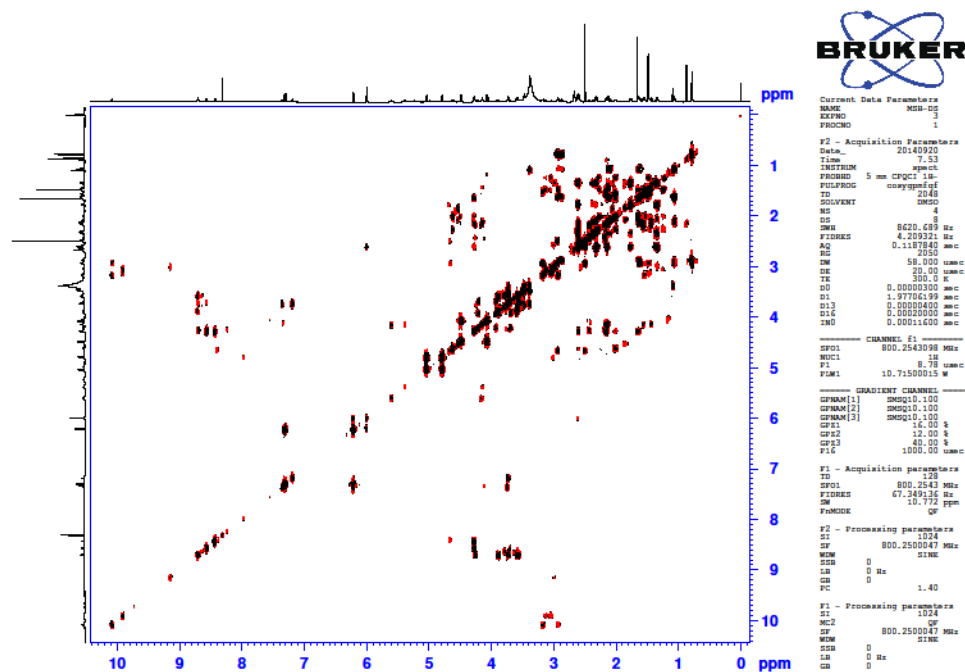

Figure S8 COSY 2D NMR spectrum of RGDS-Dex (**4b**).

(9R,10S,11S,13S,16R,17R)-9-Fluoro-7,8,11,12,13,15,16,17-octahydro-11,17-

**dihydroxy-17-(2-Arg-Gly-Asp-Phe-oxycarbonylthylcarbonyloxy)-10,13,16-trimethyl- 6H-cyclopenta[a]phenanthren-3(9H,10H,14H)one (4c)** Using the procedure of preparing **4a** from 782 mg (1.4 mmol) of **2** and 690 mg (1.4 mmol) of RGDF 231 mg (24%) of the title compound was obtained as colorless powders. Mp 181 - 184 °C. ESI/MS (m/z) 967 [M - H]<sup>-</sup>.  $[\alpha]_D^{20} = 68.8$  (c = 0.11, CH<sub>3</sub>OH). IR (KBr) 3370, 2940, 1663, 1580, 1411, 1284, 1171, 1042, 891, 650 cm<sup>-1</sup>. <sup>1</sup>H NMR (BHSC-300, DMSO-*d*<sub>6</sub>) δ/ppm = 9.93 (s, 1H), 8.73 (m, 1H), 8.51 (d, *J* = 6.6 Hz, 1H), 8.17 (m, 1H), 7.79 (m, 2H), 7.44 (m, 1H), 7.35 (d, *J* = 9.6 Hz, 1H), 7.15 (m, 5H), 7.09 (m, 1H), 6.22 (d, *J* = 9.6 Hz, 1H), 6.01 (s, 1H), 5.78 (m, 1H), 5.07 (d, *J* = 17.4 Hz, 1H), 4.79 (d, *J* = 17.4 Hz, 1H), 4.30 (m, 2H), 4.17 (m, 2H), 4.05 (m, 3H), 3.87 (m, 4H), 3.58 (m, 3H), 2.97 (m, 2H), 2.89 (m, 3H), 2.63 (m, 2H), 2.31 (m, 3H), 2.17 (m, 3H), 1.93 (m, 1H), 1.59 (m, 2H), 1.50 (s, 3H), 1.35 (m, 1H), 0.89 (s, 3H), 0.79 (d, *J* = 6.6 Hz, 3H). <sup>13</sup>C NMR (BHSC-75, DMSO-*d*<sub>6</sub>) δ/ppm = 211.66, 185.75, 178.10, 176.36, 172.34, 171.11, 168.92, 167.53, 158.35, 153.37, 129.97, 128.09, 125.97, 124.57, 102.89, 90.89, 71.36, 67.48, 65.35, 60.19, 56.02, 53.09, 51.06, 48.61, 43.75, 36.30, 35.34, 34.02, 32.53, 30.78, 28.54, 27.75, 25.59, 23.42, 21.21, 17.08, 16.72, 15.75, 14.55.

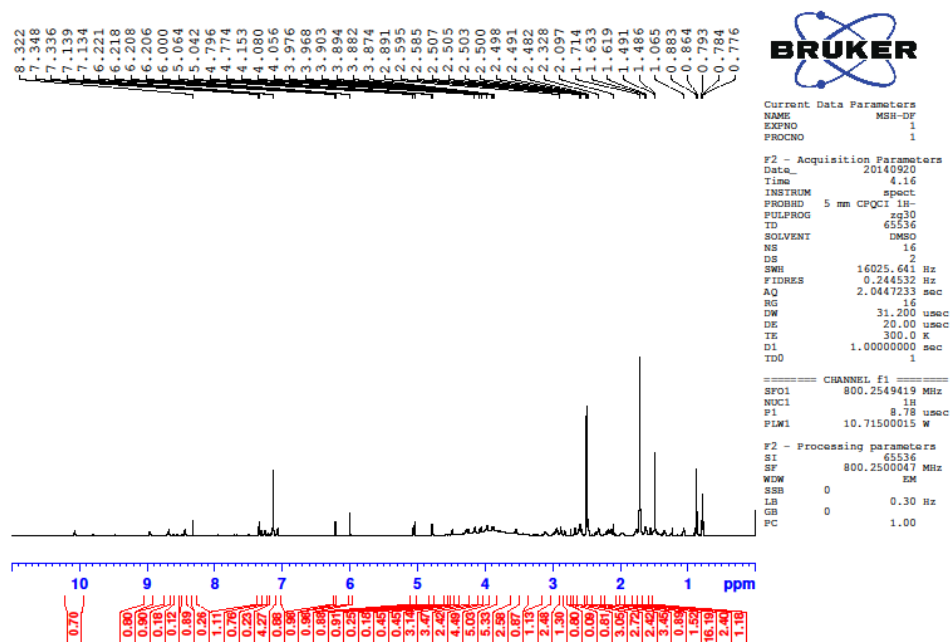

Figure S9 <sup>1</sup>H NMR of RGDF-Dex (4c).

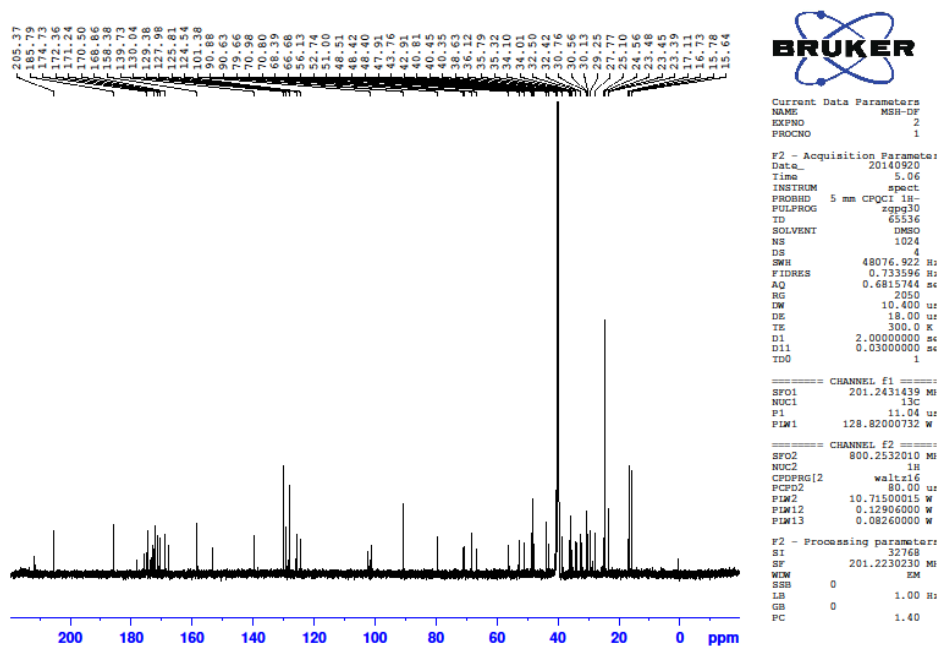

Figure S10 <sup>13</sup>C NMR of RGDF-Dex (4c).



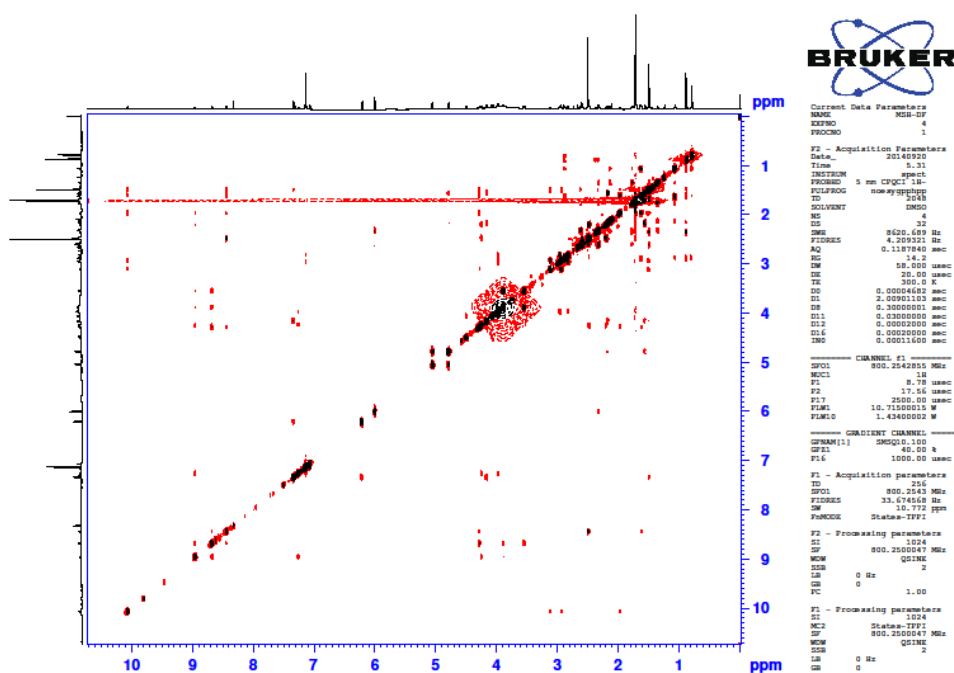

Figure S11 ROESY 2D NMR spectrum of RGDF-Dex (**4c**).

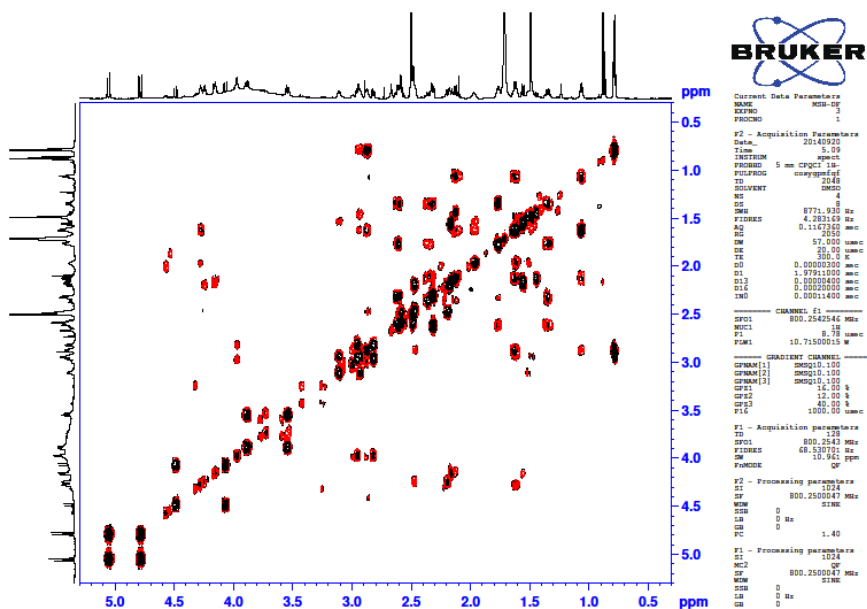

Figure S12 COSY 2D NMR spectrum of RGDF-Dex (**4c**).

### 3. Characterization

### **ESI-Mas test**

The ESI mass spectrum was acquired using a Solarix FT-ICR mass spectrometer (Bruker Daltonics) consisting of an ESI ion source and 9.4 T superconductive magnet. The measurement was carried out in the positive ion mode. A smart-beam-II laser (wavelength, 355 nm; focus setting, medium; repetition rate, 1000 Hz) was used as the ion source. The qCID mass was set to proper  $m/z$ , and the isolation window was 5  $m/z$ . Data were acquired using Solarixcontrol software. Spectral data were processed with DataAnalysis software (Bruker Daltonics).

### **3D structure generation**

The 2D structures of RGDV-Dex, RGDS-Dex and RGDF-Dex were sketched with ChemDraw Ultra 10.0. The 3D structures were created and energy minimized until the minimum rms reached 0.001 in Chem3D Ultra 10.0. Then the 3D structures were energy minimized with Discovery Studio 2.1 in the MMFF force field. The energy-minimized conformation was utilized as starting conformation for the conformation generation. The energy-minimized conformations were sampled in the whole conformational space via systematic search method and BEST method in Discovery Studio 2.1. Both the methods were performed with the SMARTminimizer using the CHARMM force field. The 20 kcal/mol/300 K of the energy threshold was set. The maximum minimization step was set to 200, and the minimization of the rms gradient was set to 0.1 Å. The maximum generated conformations were set to 255 with a rmsd cutoff of 0.2 Å. According to the 3D structures and the intermolecular interactions identified with their ROESY 2D NMR spectra and their ESI-MS spectra, the present

polymerization models were proposed.

### **Calculation to predict the formation of the nanoparticles**

The mesoscale simulation software was used to perform the calculation and to predict how much trimers of RGDV-Dex, RGDS-Dex and RGDF-Dex can form a nanoparticle of definite size. Discover module of the Materials Studio software was used for the simulation. The molecules of RGDV-Dex, RGDS-Dex and RGDF-Dex were built and optimized simply in the Visualizer window. “Beads” were constructed from atomistic simulation and placed at the center-of-mass of groups of atoms corresponding to the particular parts of the molecules of RGDV-Dex, RGDS-Dex and RGDF-Dex.

### **TEM Test**

The examinations of the shape and size of the nanospecies of RGDV-Dex, RGDS-Dex and RGDF-Dex were performed on a transmission electron microscope (TEM, JSM- 6360 LV, JEOL, Tokyo, Japan). The 1 nM aqueous solutions of RGDV-Dex, RGDS-Dex and RGDF-Dex were dripped onto a Formvarcoated copper grid, and then a drop of anhydrous ethanol was added to promote water removal. The grid was first allowed to thoroughly dry in air and was then heated at 37 °C for 24 h. The samples were viewed under the TEM. The shape and size distribution of the nanospecies were determined from counting over 100 species in randomly selected regions on the TEM copper grid. All the determinations were carried out in triplicate grids. The TEM was operated at 80 kV, electron beam accelerating voltage. Images were recorded on an imaging plate (Gatan Bioscan Camera model 1792) with 20 eV energy

windows at 6000-400 000 × and were digitally enlarged.

#### **4. Bioassays**

Male ICR mice and BALB/C mice were purchased from the Animal Center of Peking University. Work performed was based on a protocol reviewed and approved by the ethics committee of Capital Medical University. The committee assures the welfare of the animals was maintained in accordance to the requirements of the Animal Welfare Act and in accordance to the NIH Guide for Care and Use of Laboratory Animals. Statistical analyses of all the biological data were carried out by use of ANOVA.  $P < 0.05$  were considered statistically significant. The mice were maintained at 21 °C with a natural day/night cycle in a conventional animal colony.

##### **Total volumetric bone mineral density assay of femurs**

Secondary osteoporosis is common in patients treated with glucocorticoids. Chronic exposure to effective dose of Dex causes side reaction, osteoporosis. To examine the risk induced by RGD-tetrapeptide covalent modification the BALB/C mice (male, 14 weeks in age) were orally administered with 0.5 % CMC-Na or 1.43  $\mu\text{mol/kg/day}$  of Dex or RGDV-Dex or RGDS-Dex or RGDF-Dex for 15 consecutive days to measure the total volumetric bone mineral density (vBMD) and the peripheral quantitative CT (pQCT). Computed tomography (CT) allows testing 3D bone geometry and provides size- independent vBMD. The peripheral quantitative CT (pQCT) allows quantitative test of 3D bone geometry and quantitatively provides size-independent vBMD.

##### **Femur weight assay**

After vBMD and pQCT measurements the mice orally treated with 0.5 % CMC-Na or

1.43  $\mu\text{mol/kg/day}$  of Dex or RGDV-Dex or RGDS-Dex or RGDF-Dex for 15 consecutive days received euthanasia, their left femurs were immediately collected, completely removed the muscle to measure their lengths, immersed in a 2/1 solution of chloroform and methanol ( $3\text{ h} \times 2$ , each) to defat, heated at  $120\text{ }^{\circ}\text{C}$  for 6 h, cooled and weighed to record their dry weight. The femurs were calcined in a furnace at  $800\text{ }^{\circ}\text{C}$  for 8 h, cooled, weighed to record the ash weight, and the ratio of the ash weight to dry femur weight (the mineral content of the femur) was calculated. The ashes of the left femurs were dissolved in 0.5 mL of hydrochloric acid (6 M) and diluted to 5.00 mL with ultrapure water, from which 0.05 mL of the solution was drawn and diluted to 1.00 mL with ultrapure water before use. The content of calcium in the solution was tested with the method of o-methylphenolphthalein complexing ketone, while the content of phosphorus in the solution was tested with the method of molybdenum blue.

#### **Anti-inflammatory assay**

The anti-inflammatory assay of Dex, RGDV-Dex, RGDS-Dex and RGDF-Dex were performed with xylene-induced ear edema, and the clinical dose of Dex in the anti-inflammatory therapy was converted for the mice. In brief, male ICR mice ( $18 \pm 2\text{ g}$ ) were randomly divided into five groups, each 12 mice. The mice in vehicle control group were orally given 0.5 % CMC-Na at a dose of 0.2 mL/mouse, and the mice in positive group were orally given the suspension of Dex in 0.5 % CMC-Na at a dose of  $25.5\text{ }\mu\text{mol/kg}$ , and the mice in RGDV-Dex, RGDS-Dex and RGDF-Dex groups were orally given the suspension of RGDV-Dex, RGDS-Dex and RGDF-Dex in 0.5 % CMC-Na at a dose of  $25.5\text{ }\mu\text{mol/kg}$ . Thirty minutes after the administration, 30  $\mu\text{L}$  of

xylene was applied to the anterior and posterior surfaces of the right ear, with the left ear as control. Two hours after xylene application, the mice received euthanasia to remove both ears. By using a cork borer of 7 mm in diameter the circular slices were collected and weighed. The increased weight caused by the irritant was calculated by subtracting the weight of the untreated left ear slice from that of the treated right ear slice.

### **Effect of dose on the anti-inflammation activity**

The 25.5, 2.55 and 0.255  $\mu\text{mol/kg}$  of RGDS-Dex was used as the representatives to reveal the dose-activity relationship. In brief by using the same procedure as that of item **Anti-inflammatory assay** the xylene-induced ear edema of the mice treated with 25.5, 2.55 and 0.255  $\mu\text{mol/kg}$  of RGDS-Dex were tested.

### **DNA expression assay**

DNA expression assay was carried out with A549 cells. In brief, aliquots of  $3 \times 10^5$  cells were seeded in six well plates, incubated at 37 °C for 24 h, treated with fresh medium alone (negative control), or with fresh medium containing Dex, RGDF-Dex, RGDS-Dex or RGDV-Dex (final concentration, 1  $\mu\text{M}$ ) and incubated for another 48 h. The cells were harvested, centrifuged at 2500 g for 5 min, resuspended in 200  $\mu\text{L}$  PBS, to which 20  $\mu\text{L}$  Proteinase K and 20  $\mu\text{L}$  RNaseA were added according to Genomic DNA Kits (Catalog Numbers K182001, Invitrogen, 3175 Staley Road, Grand Island, New York, USA). The wells were mixed by brief vortexing, and incubate at room temperature for 2 min. To the cells 200  $\mu\text{L}$  lysis and binding buffer were added and mixed well by vortexing to obtain a homogenous solution, and then incubated at 55

°C for 10 min to promote the digestion of the protein. To each well 200 µL ethanol (96%) was added and the lysate was mixed by vortexing for 5 sec to yield a homogenous solution. At room temperature the lysate (~640 µL) was centrifuged at 10000 g for 1 min, and 500 µL wash buffer was added and centrifuged at room temperature at 16000 g for 3 min. To the residues 30 µL of elution buffer was added, incubated at room temperature for 1 min, and then centrifuged at 16000 g for 1 min at room temperature. The supernatant solution was transferred to a sterile 1.5 mL microcentrifuge tube for analysis. The DNA concentration was measured by Nanodrop 1000 (NanoDrop products, 3411 Silverside Rd, Bancroft Building, Wilmington, DE 19810, USA).

#### **Plasma TNF- $\alpha$ assay**

To understand the possible mechanism of RGD-tetrapeptide covalent modification enhancing anti-inflammatory activity the TNF- $\alpha$  of the plasma of xylene-induced ear edema of mice orally treated with 0.5% CMC-Na, or the suspensions of Dex, RGDS-Dex, RGDF-Dex and RGDV-Dex in 0.5% CMC-Na were measured. In brief, to prepare the plasma sample 9 mL of blood collected from health mice or xylene-induced ear edema mice receiving 0.5% CMC-Na or 25 µmol/kg Dex, or 25 µmol/kg conjugates into a syringe containing 1 mL 3.8% sodium citrate. Sample was centrifuged at 4 °C and 3000  $\times$  g for 30 min to prepare plasma sample. To each of blank wells nothing was added. To each of standard wells 50 µL standard solutions and 100 µL HRP-conjugate were added. To each of testing wells 10µL plasma of inflammation mice 40µL sample diluents and 100 µL HRP-conjugate were

successively added. The wells were aspirated, washed by filling with 400  $\mu$ L wash solution via a squirt bottle and the liquid was completely moved, which was repeated for 5 times. The plate was inverted and blotted with clean paper towels, closed with closure plate membrane and incubated at 37 °C for 60 min. On uncovering plate membrane the liquid were discarded, the wells were dried by swing, to the residue sufficient washing buffer was added, stilled for 30s and then drained. This procedure was repeated for 5 times, the wells were dried by pat. To the residue 50  $\mu$ L chromogen solutions A and B were added, gently mixed and at 37 °C and in dark incubated for 10 min. To each well 50  $\mu$ L stop solution was added, and the color in the well changed from blue to yellow. The plate was read at 450 nm using a microtiter plate reader within 15 min to record O.D. value. According to the standard curve the concentration of plasma TNF- $\alpha$  was calculated.

### **Plasma IL-8 assay**

To understand the possible mechanism of RGD-tetrapeptide covalent modification enhancing anti-inflammatory activity the IL-8 of the plasma of xylene-induced ear edema of mice orally treated with 0.5% CMC-Na, or the suspensions of Dex, RGDS-Dex, RGDF-Dex and RGDV-Dex in 0.5% CMC-Na were measured. In brief, in the preparation of the plasma sample 9 mL of blood collected from health mice or xylene-induced ear edema mice receiving 0.5% CMC-Na or 25  $\mu$ mol/kg Dex, or 25  $\mu$ mol/kg conjugates into a syringe containing 1 mL 3.8% sodium citrate. Sample was centrifuged at 4 °C and 3000  $\times$  g for 30 min to prepare plasma sample. To each of blank wells 100  $\mu$ L sample diluent was added. To each of standard wells 50  $\mu$ L



standard solution and 50  $\mu$ L Streptavidin-HRP were added. To each of the wells 40  $\mu$ L plasma sample of the mice receiving 0.5% CMC-Na, 25  $\mu$ mol/kg Dex, RGDS-Dex, RGDF-Dex and RGDV-Dex, 10  $\mu$ L of anti-IL-8-antibody and 50  $\mu$ L of Streptavidin-HRP were added. The plate was closed with plate membrane and at 37 °C incubated for 60 min. On uncovering plate membrane the liquid was discarded and the wells were dried by swing, to the residue sufficient washing buffer was added, stilled for 30s and then drained. The procedure was repeated for 5 times and the wells were dried by pat. To the residue 50  $\mu$ L chromogen solutions A and B were added, gently mixed and at 37 °C in dark incubated for 10 min. To each well 50  $\mu$ L stop solution was added, and the plate was read at 450 nm using a microtiter plate reader within 15 min to record O.D. value. According to the standard curve the concentrations of IL-8 in plasma were calculated.

#### **ROESY 2D NMR spectra showing the hydroxyl of Dex modified by RGD-peptides**

To show which hydroxyl of Dex was modified by RGD-peptides the ROESY 2D NMR spectra were analyzed, the cross-peaks were marked with blue rings and are shown in Figures S13-S15. As seen, the spectra consistently give a cross peak from -CO-CH<sub>2</sub>-O- (4.20 ppm) and -O-CO-CH<sub>2</sub>-CH<sub>2</sub>-CO- (2.16 ppm). Thus among 11-hydroxy, 17-hydroxy and 17-(2-hydroxyacetyl) of Dex only the latter was modified.

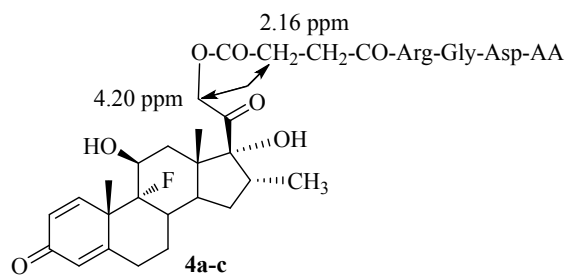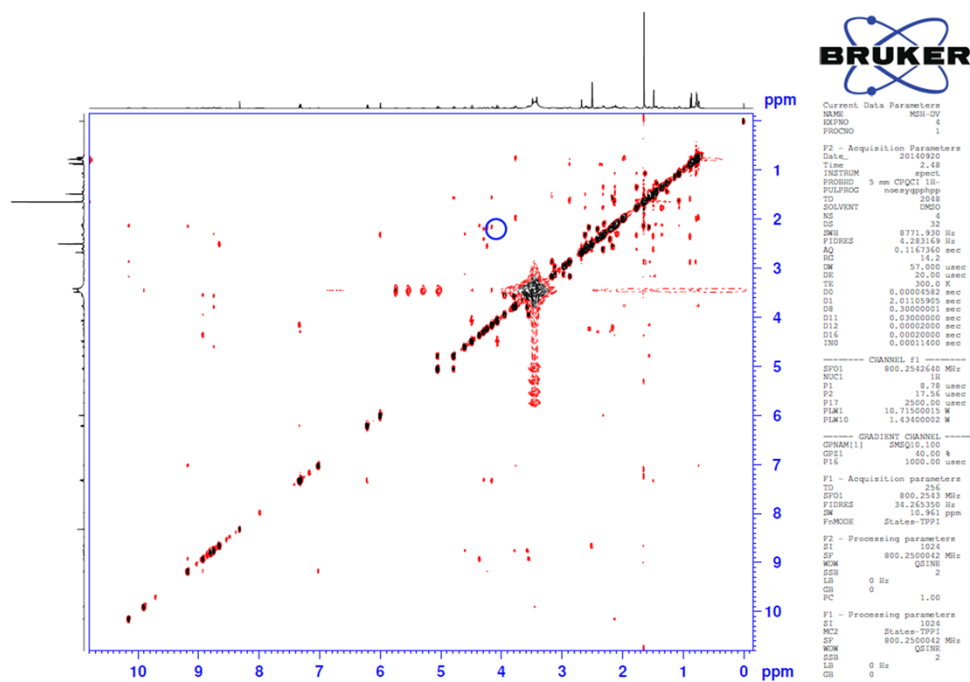

Figure S13 ROESY 2D NMR spectrum of RGDV-Dex (4a)

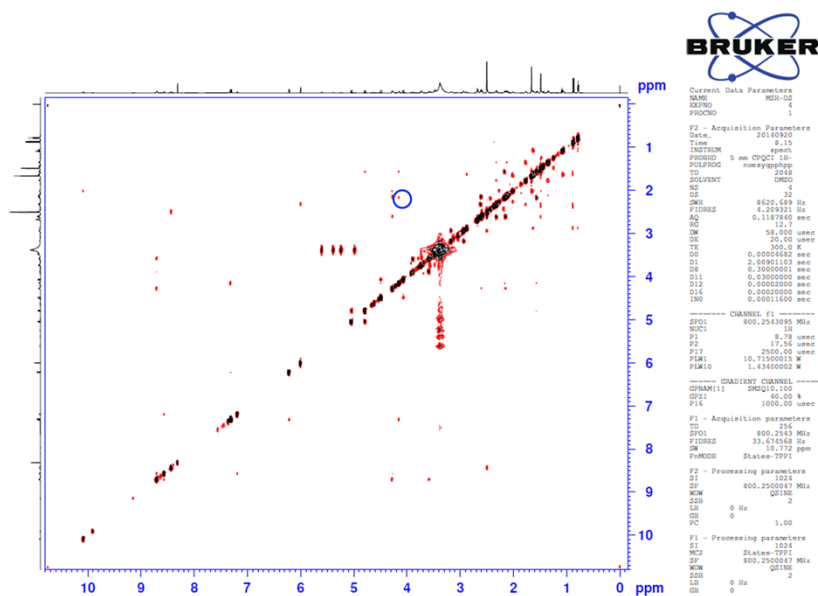

**BRUKER**

Current Data Parameters  
NAME: 4  
EXPNO: 1  
PROCNO: 1

F2 - Acquisition Parameters  
Date\_: 20180908  
Time: 5.31  
INSTRUM: spect  
PROBHD: 5 mm CPQCI 1H-  
PULPROG: megaraghuap  
SOLVENT: DMSO  
NS: 2048  
DS: 4  
SWH: 8624.658 Hz  
F2FREQ: 62.001311 Hz  
F2RES: 0.1187000 Hz  
AQ: 14.2  
RG: 315.000 usec  
DE: 28.00 usec  
TE: 300.2 K  
DQ: 0.0000440 usec  
D1: 2.00001123 usec  
D2: 0.30000000 usec  
D3: 0.03000000 usec  
D4: 0.03000000 usec  
D5: 0.00000000 usec  
D6: 0.00000000 usec  
D7: 0.00014000 usec

----- CHANNEL f1 -----  
EXP01 800.2542655 MHz  
NUC1 1H  
P1 8.70 usec  
P2 17.34 usec  
P17 2900.00 usec  
PLW1 10.71506815 W  
PLW10 1.43600002 W

----- CHANNEL CHANNEL -----  
CHNAME11 DMSO-D6-100  
DMSO 40.00  
P16 1000.00 usec

F1 - Acquisition parameters  
TD 256  
EXP01 800.25418 MHz  
F1FREQ: 50.745638 Hz  
SW 10.772 ppm  
PULPROG: Staircase-TPP1

F2 - Processing parameters  
SI 32768  
SF 800.2500454 MHz  
WDW EM  
SSB 0 Hz  
GB 0  
PC 1.00

F1 - Processing parameters  
SI 32768  
SF 800.2500454 MHz  
WDW EM  
SSB 0 Hz  
GB 0

**Figure S16** TEM images of 1  $\mu\text{M}$  solution of the conjugates in ultrapure water: (a) TEM images of RGDV-Dex; (b) TEM images of RGDS-Dex; (c) TEM images of RGDF-Dex.
